# Supplementary material for: Iridium(iii) complexes conjugated with naproxen exhibit potent anti-tumor activities by inducing mitochondrial damage, modulating inflammation, and enhancing immunity
Source: Royal Society of Chemistry journal article supplement (doi:10.1039/d4dt00575a), 2024-01-01
Supplement: d4dt00575a1.pdf [file d4dt00575a1.pdf]

## Supporting Information

### **Iridium(III) complexes conjugated with naproxen exhibiting potent anti-tumor activities by inducing mitochondrial damage, modulating inflammation, and enhancing immunity**

**Kai Xie <sup>1</sup>, Xing-Yun Lu <sup>1</sup>, Hou Zhu, Lin-Yuan Zhu, Rong-Tao Li\* and Rui-Rong Ye\***

*Faculty of Life Science and Technology, Kunming University of Science and Technology, Kunming  
650500, P. R. China*

\* Corresponding author.

E-mail addresses: rongtaolikm@163.com (R.-T. Li), yerr@mail2.sysu.edu.cn (R.-R. Ye).

<sup>1</sup> These authors contributed equally to this work.

## Supporting Experimental Methods

### Cell lines and culture conditions

HeLa, HepG2, A549, A549R and LO2 were purchased from Nanjing KGI Biotech. RPMI 1640 medium was used to incubate A549, DMEM medium was used to culture LO2, HepG2, and HeLa, and cisplatin-containing DMEM medium was used to culture A549R. All five types of cells were cultured in a cell culture incubator at 37 °C and 5% CO<sub>2</sub>.

### MTT assay for cytotoxicity

The cells were inoculated in 96-well plates. After 24 h, the cells were co-incubated with different concentrations of **Ir-NPX-1-3**. Next, cells were placed in a cell culture incubator and continued to incubate for 44 h. 20 μL MTT was added to each well, and after 4 h, the absorbance at 590 nm was detected. Finally, the IC<sub>50</sub> of the complexes was calculated using SPSS software.

### Cell co-localization experiments

**Ir-NPX-1-3** (20 μM) was added and incubated for 3 h. Next, the cells were co-incubated with the commercial lysosomal probe LTDR (50 nM) or the mitochondrial probe MTDR (150 nM) for 30 min. Subsequently, the cells were washed twice with PBS, and the cells were observed using a laser confocal microscope. ( $\lambda_{\text{ex}} = 405 \text{ nm}$  for **Ir-NPX-1-3**, 633 nm for MTDR and LTDR;  $\lambda_{\text{em}} = 600 \pm 20 \text{ nm}$  for **Ir-NPX-1-3**, 665 ± 20 nm for MTDR and LTDR).

### MMP analysis

The indicated concentrations of **Ir-NPX-1-3** were added to A549R cells and incubated for 6 h, then 1 mL of JC-1 (5 μg/mL) was added and co-incubated with the cells for 30 min. Cells were washed twice with PBS, and examined using laser confocal microscopy or flow cytometry. ( $\lambda_{\text{ex}} = 488 \text{ nm}$ ;  $\lambda_{\text{em}} = 530 \pm 20 \text{ nm}$  (Green), 585 ± 20 nm (Red)).

### Measurement of ROS levels

Cells were incubated with different concentrations of **Ir-NPX-1-3** for 6 h. Subsequently, H<sub>2</sub>DCFDA (10 μM) was added for a total of 15 min, and at the end of the incubation, the cells were washed twice by PBS and observed using laser confocal microscopy. ( $\lambda_{\text{ex}} = 488 \text{ nm}$ ;  $\lambda_{\text{em}} = 530 \pm 20 \text{ nm}$ ).

### Annexin V staining

Cells were inoculated into 6-well plates. After 24 h, cells were treated with different concentrations of **Ir-NPX-1-3** for 24 h. Then, cells were collected, centrifuged, and resuspended in PBS. Cell staining was performed according to the Annexin V-FITC Apoptosis Detection Kit. Quantification was performed by flow cytometry. ( $\lambda_{\text{ex}} = 488 \text{ nm}$ ;  $\lambda_{\text{em}} = 530 \pm 20 \text{ nm}$ ).

### **Scratch healing assay**

Cells were treated with **Ir-NPX-1-3** (1.0  $\mu\text{M}$ ) for 0 h, 24 h, and 48 h. A crosshatch was made inside the cell wells, the medium was aspirated and the cell debris was washed, and the scratches were subsequently observed under a fluorescence inverted microscope, and the positions of the scratches were photographed and recorded. The healing of cell scratches was recorded by fluorescence inverted microscope after 24 h and 48 h of incubation.

### **Colony formation experiments**

Cells were cultured in 6-well plates until apposition, medium containing **Ir-NPX-1-3** was added, and incubated for 24 h. Subsequently, the culture medium was replaced with fresh medium and cultured for one week. Finally, the cells were rinsed twice with PBS and then fixed with 4% paraformaldehyde for 10 min, and the cell colony formation was observed by staining using crystal violet.

### **Immunogenic cell death**

After treatment with the indicated concentration of **Ir-NPX-1-3** for 24 h, cells were fixed for 20 min with 4% paraformaldehyde. Then cells were washed three times with PBS and incubated with TrionX-100 for 15 min at room temperature. Subsequently, the samples were closed for 1 h with immunostaining blocking solution, washed again with PBS, the primary antibody (CRT and HMGB1) was added and placed overnight at 4 °C. After completion, the samples were incubated with the fluorescent labeled secondary antibody (Alexa Fluor 488-labeled Goat Anti-Rabbit IgG(H+L)) for 1 h at room temperature, and observed under a laser confocal microscopy. ( $\lambda_{\text{ex}} = 488 \text{ nm}$ ;  $\lambda_{\text{em}} = 530 \pm 20 \text{ nm}$ ).

### **Determination of ATP content**

Cells were treated with the indicated concentration of **Ir-NPX-1-3** for 24 h. Then the culture medium was aspirated and 200  $\mu\text{L}$  of lysate was added to each well. After lysis, the samples were

centrifuged at 12000 g for 5 minutes at 4 °C to removed the supernatant. The ATP content was measured using the ATP Assay Kit According to the manufacturer's protocol.

### **Statistical analysis**

Biological experiments were repeated more than 3 times and the mean  $\pm$  SD shows the results.

## Supplementary Scheme, Figures and Tables

### Scheme S1 Synthetic route of Ir-NPX-1-3

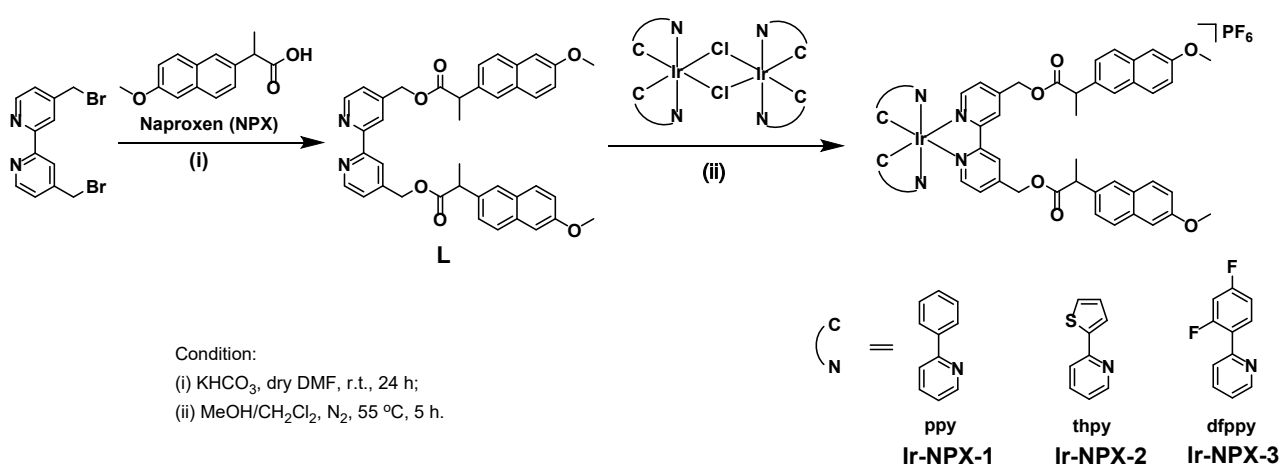

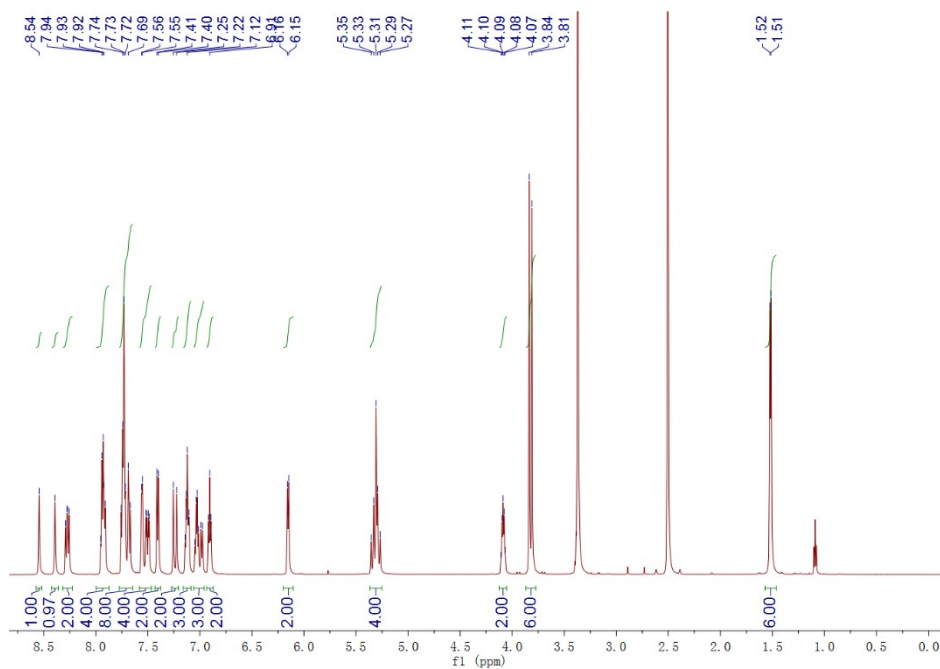

**Fig. S1**  $^1\text{H}$  NMR spectrum characterization of **Ir-NPX-1** in  $\text{DMSO-d}_6$  (600 MHz, 25  $^\circ\text{C}$ ).

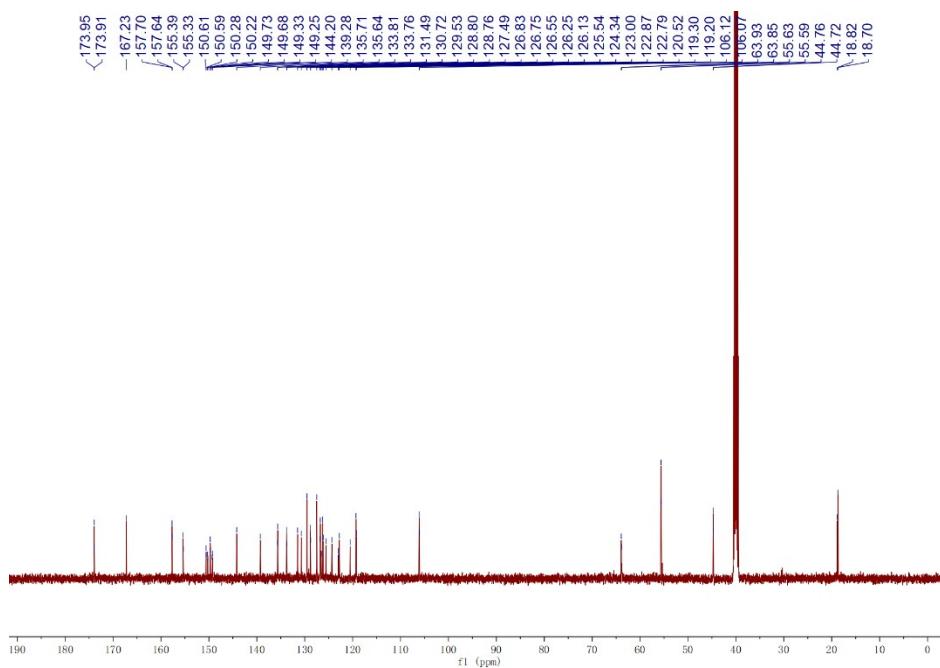

**Fig. S2**  $^{13}\text{C}$  NMR spectrum characterization of **Ir-NPX-1** in  $\text{DMSO-d}_6$  (125 MHz, 25  $^\circ\text{C}$ ).

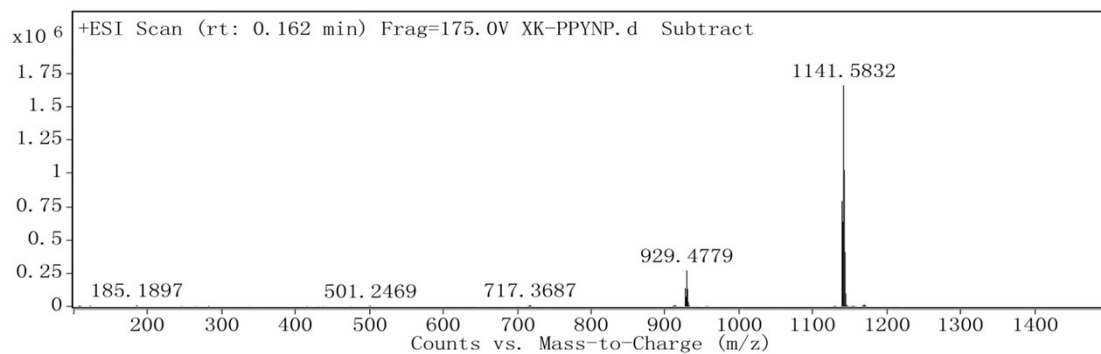

**Fig. S3** ESI-HRMS characterization of **Ir-NPX-1** in CH<sub>3</sub>OH, 1141.5832 [M-PF<sub>6</sub>]<sup>+</sup>.

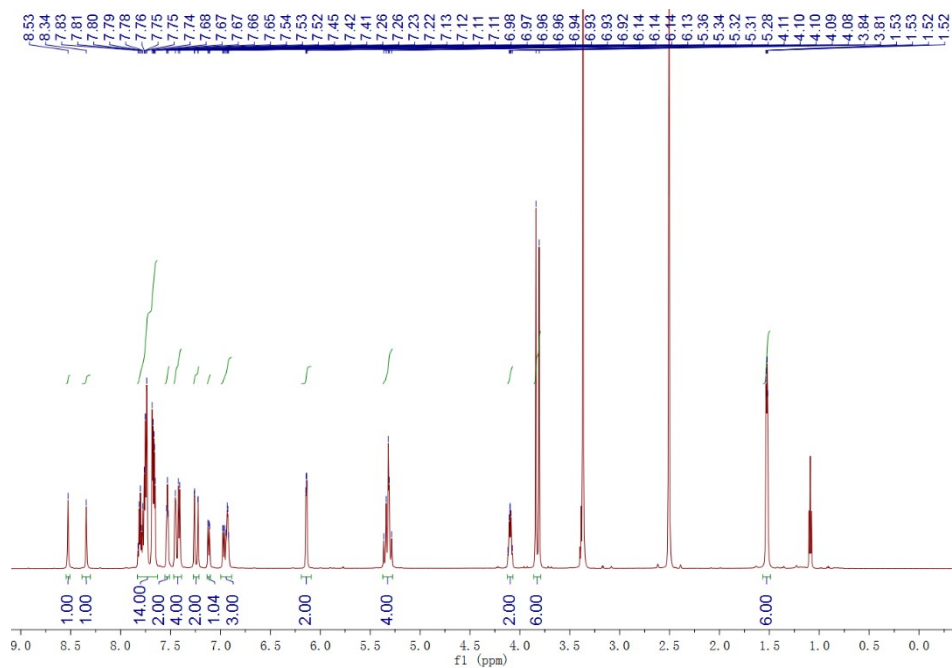

**Fig. S4** <sup>1</sup>H NMR spectrum characterization of **Ir-NPX-2** in DMSO-d<sub>6</sub> (600 MHz, 25 °C).

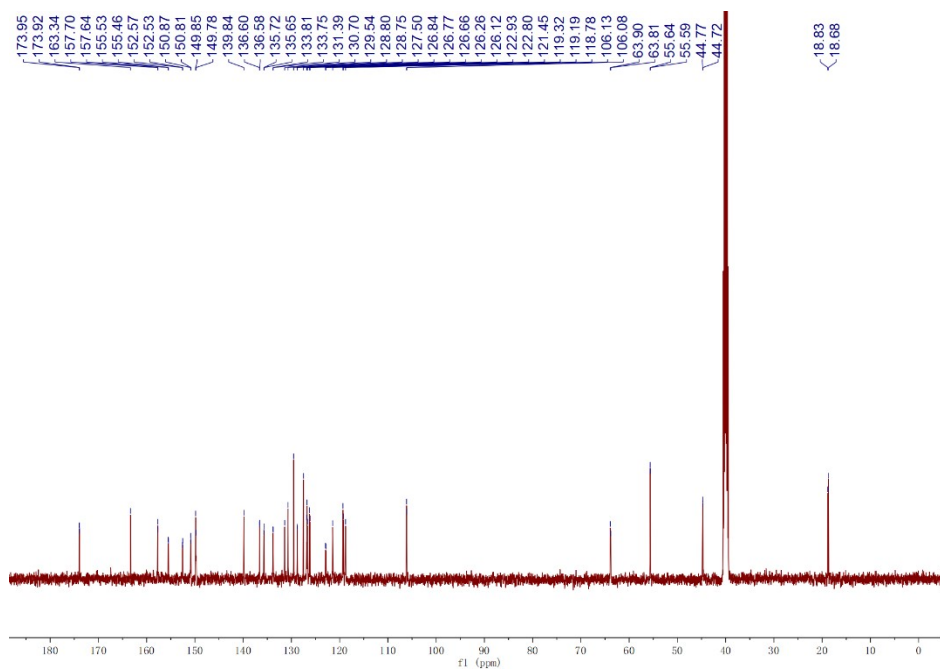

**Fig. S5**  $^{13}\text{C}$  NMR spectrum characterization of **Ir-NPX-2** in  $\text{DMSO-d}_6$  (125 MHz, 25 °C).

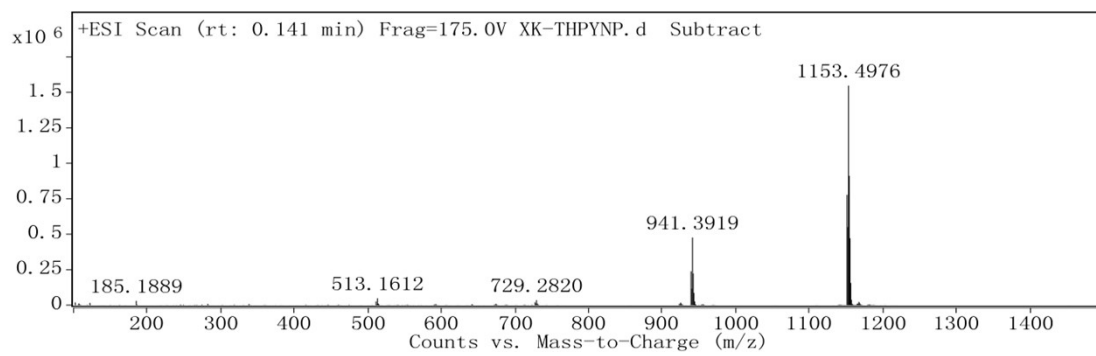

**Fig. S6** ESI-HRMS characterization of **Ir-NPX-2** in  $\text{CH}_3\text{OH}$ , 1153.4976  $[\text{M-PF}_6]^+$ .



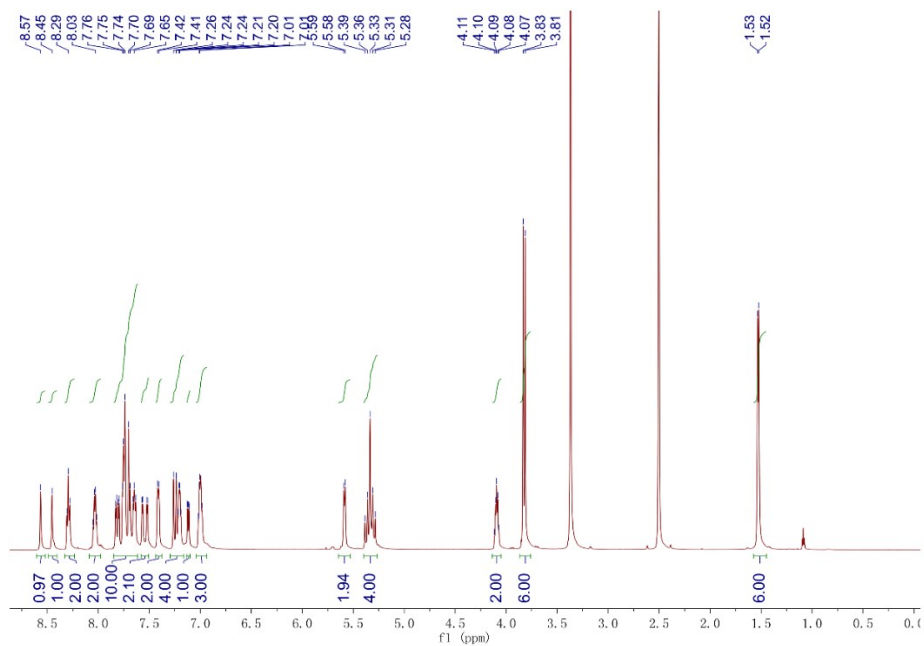

**Fig. S7**  $^1\text{H}$  NMR spectrum characterization of Ir-NPX-3 in DMSO- $\text{d}_6$  (600 MHz, 25  $^\circ\text{C}$ ).

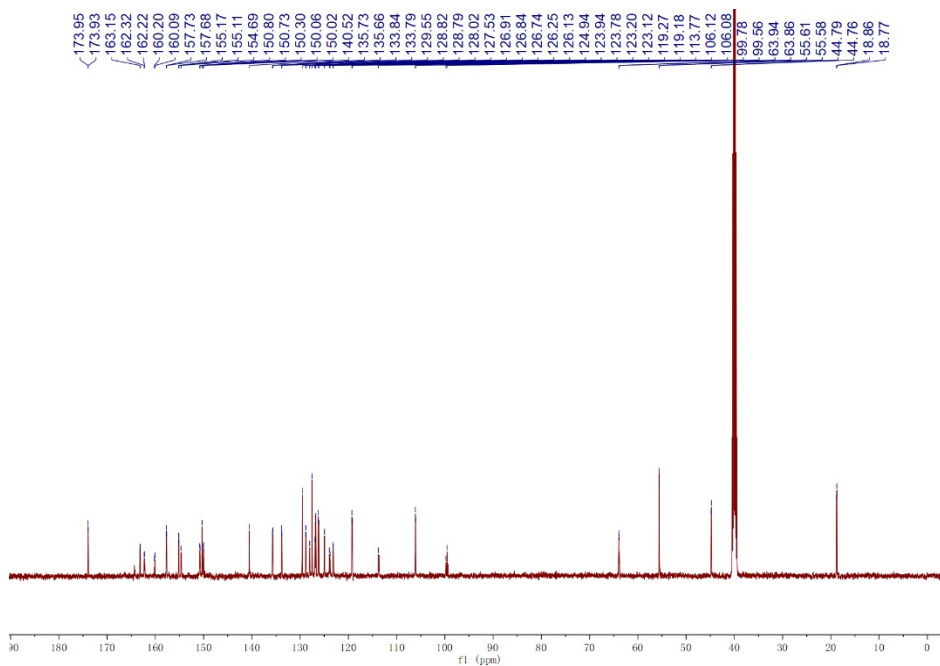

**Fig. S8**  $^{13}\text{C}$  NMR spectrum characterization of Ir-NPX-3 in DMSO- $\text{d}_6$  (125 MHz, 25  $^\circ\text{C}$ ).

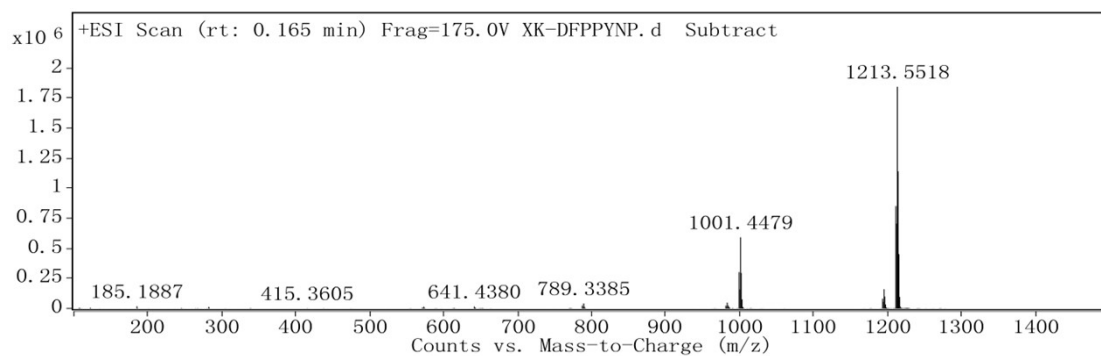

**Fig. S9** ESI-HRMS characterization of **Ir-NPX-3** in CH<sub>3</sub>OH, 1213.5518 [M-PF<sub>6</sub>]<sup>+</sup>.

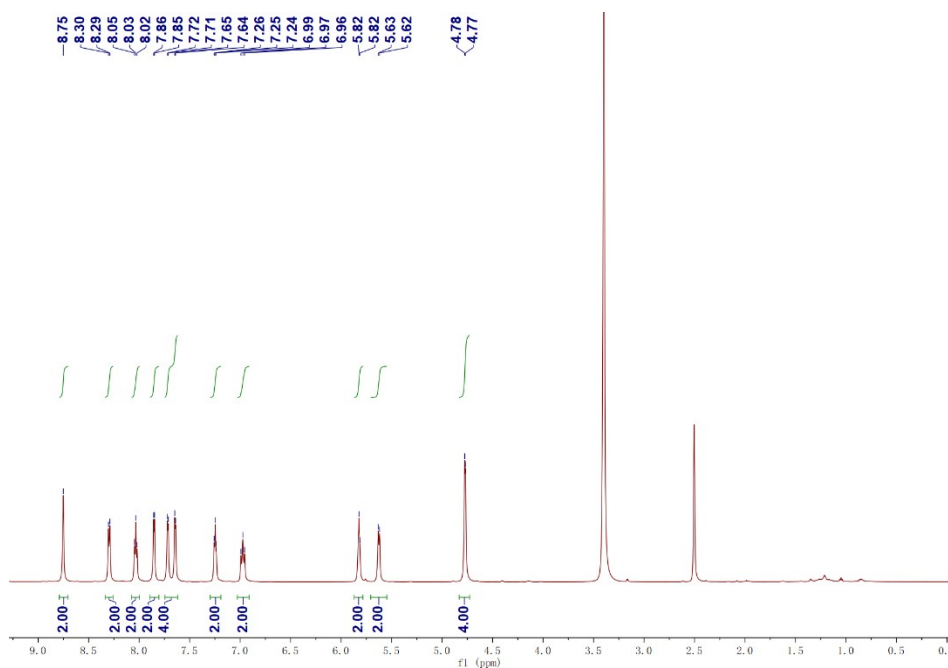

**Fig. S10** <sup>1</sup>H NMR spectrum characterization of **Ir3** in DMSO-d<sub>6</sub> (600 MHz, 25 °C).

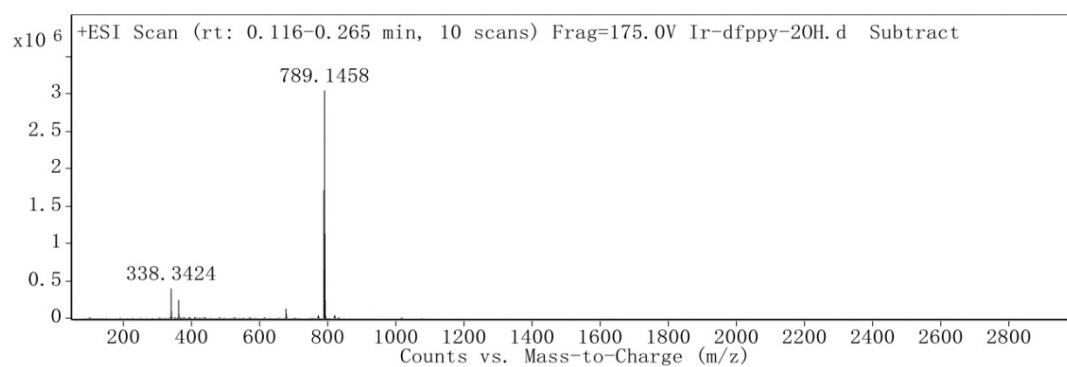

**Fig. S11** ESI-HRMS characterization of **Ir3** in CH<sub>3</sub>OH, 789.1458 [M-PF<sub>6</sub>]<sup>+</sup>.

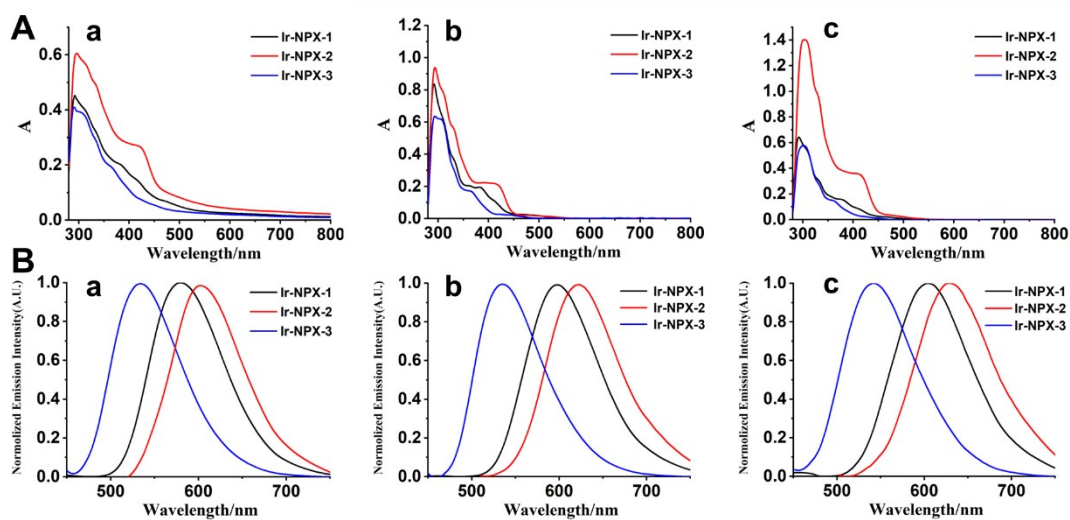

**Fig. S12** (A) UV-Vis absorption spectra of **Ir-NPX-1-3** in PBS, CH<sub>2</sub>Cl<sub>2</sub>, and CH<sub>3</sub>CN solutions. (B) Emission spectra of **Ir-NPX-1-3** in PBS, CH<sub>2</sub>Cl<sub>2</sub>, and CH<sub>3</sub>CN solutions ( $\lambda_{\text{ex}} = 405$  nm).

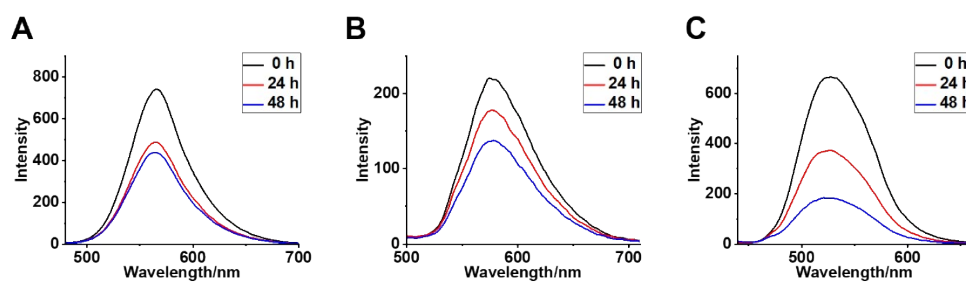

**Fig. S13** Emission spectra of **Ir-NPX-1** (A), **Ir-NPX-2** (B) and **Ir-NPX-3** (C) measured in PBS at 0 h, 24 h and 48 h ( $\lambda_{\text{ex}} = 405$  nm).

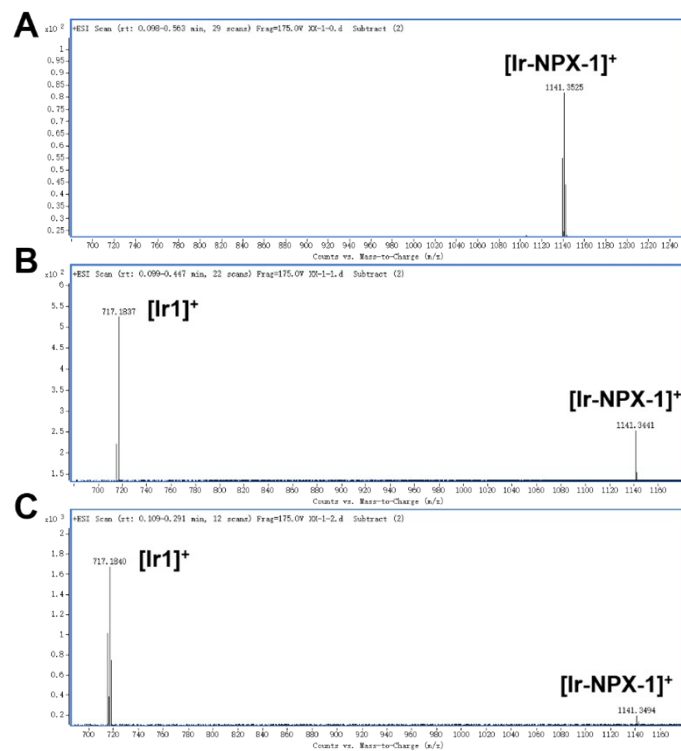

**Fig. S14** Mass spectra of Ir-NPX-1 (20  $\mu$ M) dispersed in PBS upon treatment with PLE at 298 K for (A) 0 h, (B) 1 h and (C) 2 h.

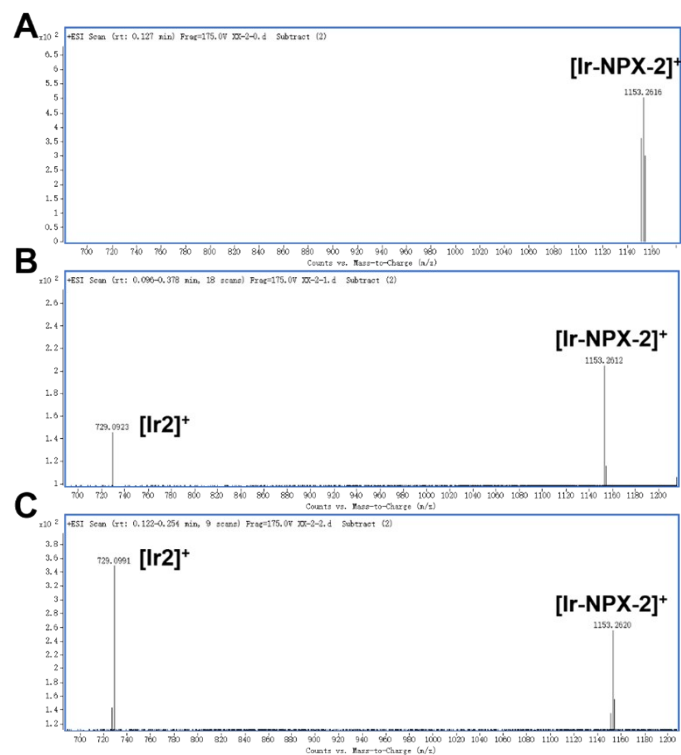

**Fig. S15** Mass spectra of Ir-NPX-2 (20  $\mu$ M) dispersed in PBS upon treatment with PLE at 298 K for (A) 0 h, (B) 1 h and (C) 2 h.

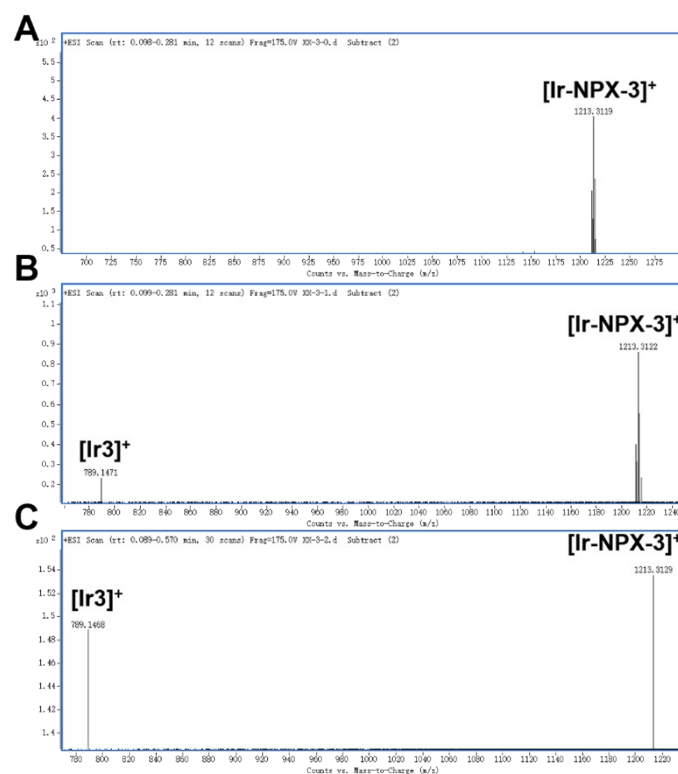

**Fig. S16** Mass spectra of Ir-NPX-3 (20  $\mu\text{M}$ ) dispersed in PBS upon treatment with PLE at 298 K for (A) 0 h, (B) 1 h and (C) 2 h.

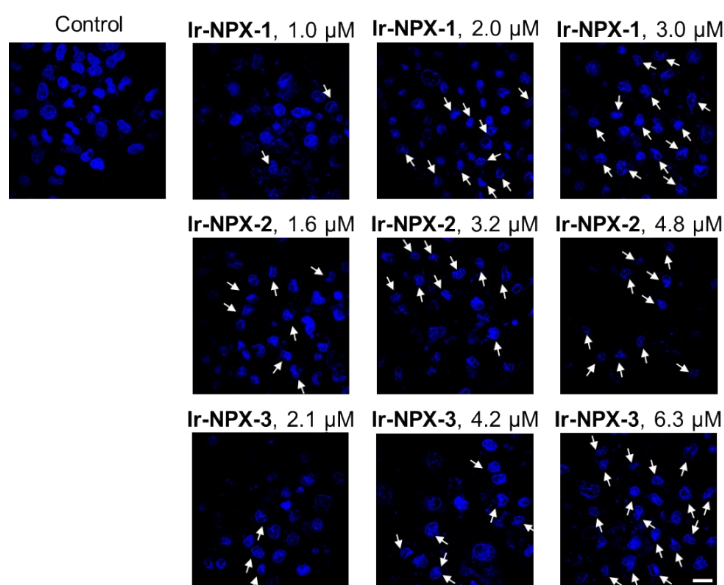

**Fig. S17** Observation of the effect of Ir-NPX-1–3 on cell nucleus by Hoechst 33342 staining ( $\lambda_{\text{ex}} = 405 \text{ nm}$ ;  $\lambda_{\text{em}} = 460 \pm 20 \text{ nm}$ ). Scale bar: 20  $\mu\text{m}$ . The arrows indicate the apoptotic morphological nuclei.

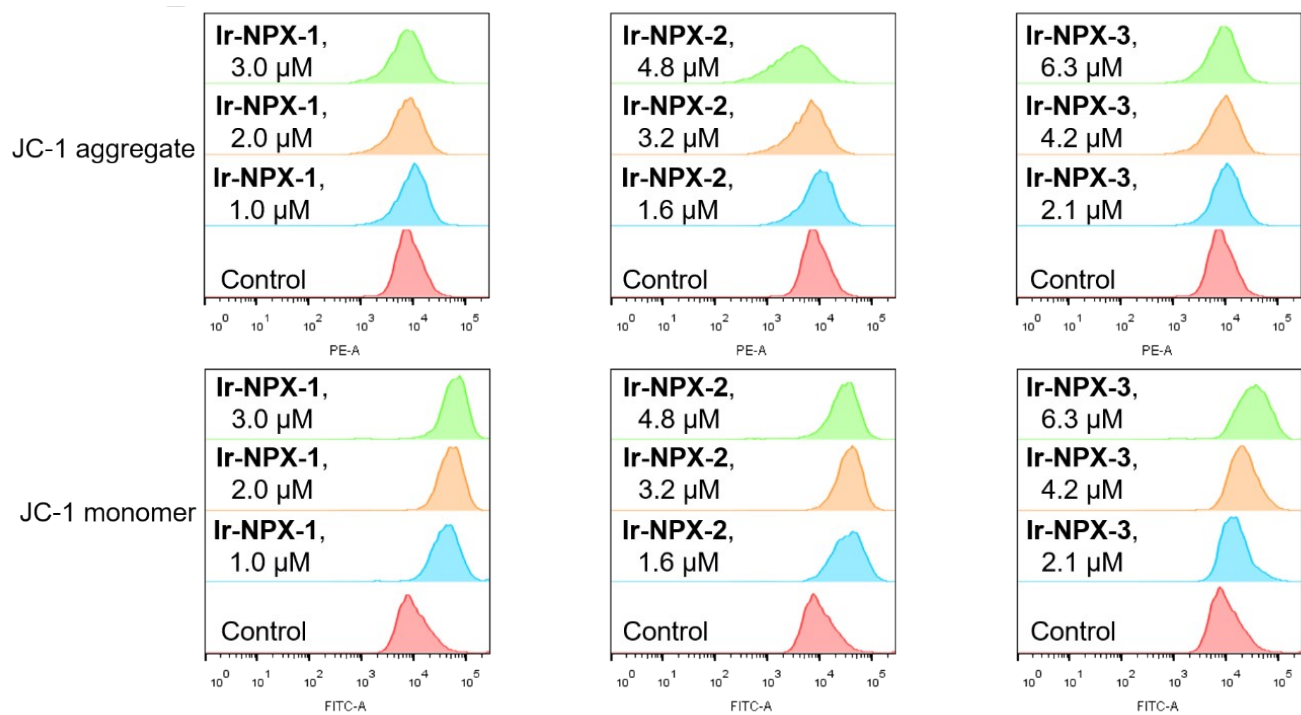

**Fig. S18** The effect of Ir-NPX-1–3 on the change of MMP. A549R cells were treated with Ir-NPX-1–3 at the indicated concentration for 6 h, then labelled with JC-1, and observed by flow cytometry ( $\lambda_{\text{ex}} = 488 \text{ nm}$ ;  $\lambda_{\text{em}} = 530 \pm 20 \text{ nm}$  (Green),  $585 \pm 20 \text{ nm}$  (Red)). Scale bar: 20  $\mu\text{m}$ .

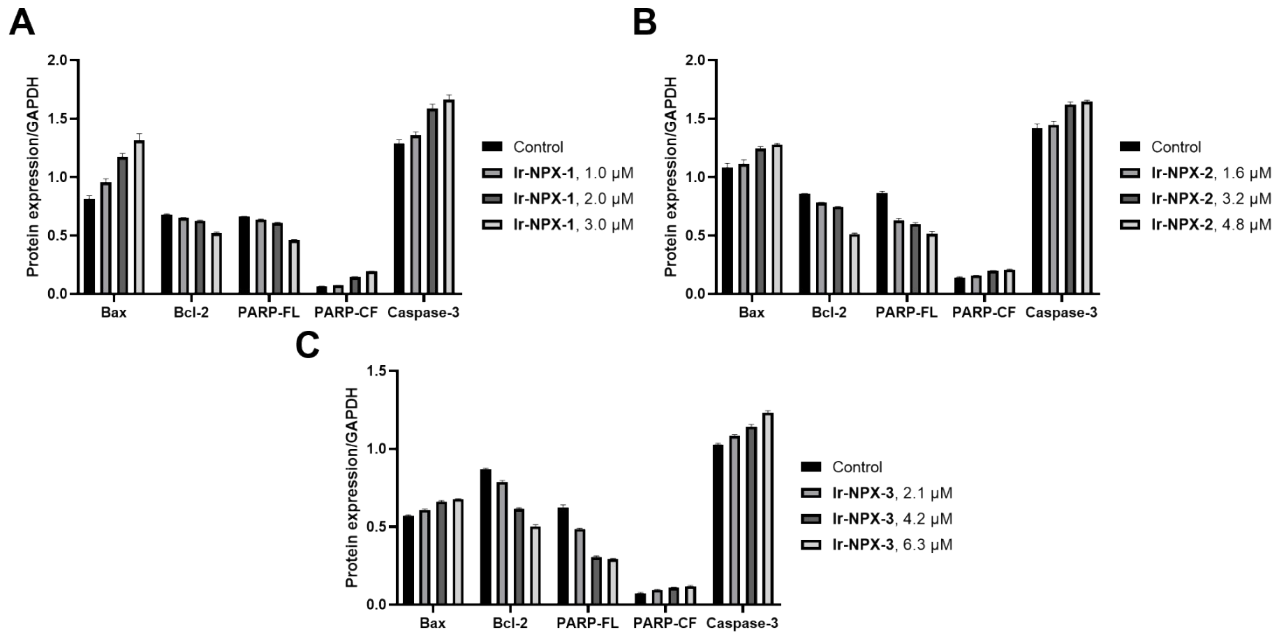

**Fig. S19** Histograms of protein expression (Bax, Bcl-2, PARP and Caspase-3) treated with Ir-NPX-1-3.

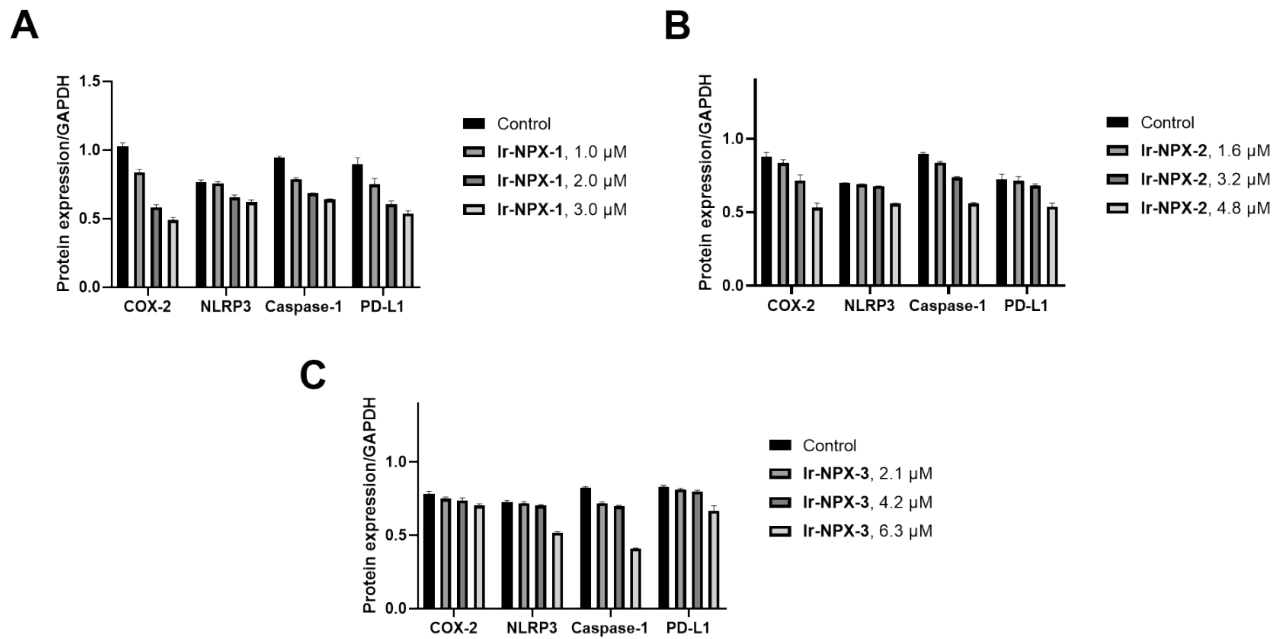

**Fig. S20** Histograms of protein expression (COX-2, NLRP3, Caspase-1 and PD-L1) treated with Ir-NPX-1-3.

**Table S1** Photophysical data of **Ir-NPX-1–3** in PBS, CH<sub>2</sub>Cl<sub>2</sub>, and CH<sub>3</sub>CN

| Compounds       | Medium                          | $\lambda_{\text{abs, max}}$ (nm) | $\lambda_{\text{em, max}}$ (nm) |
|-----------------|---------------------------------|----------------------------------|---------------------------------|
| <b>Ir-NPX-1</b> | PBS                             | 419                              | 580                             |
|                 | CH <sub>2</sub> Cl <sub>2</sub> | 414                              | 603                             |
|                 | CH <sub>3</sub> CN              | 412                              | 597                             |
| <b>Ir-NPX-2</b> | PBS                             | 425                              | 603                             |
|                 | CH <sub>2</sub> Cl <sub>2</sub> | 415                              | 627                             |
|                 | CH <sub>3</sub> CN              | 419                              | 624                             |
| <b>Ir-NPX-3</b> | PBS                             | 435                              | 534                             |
|                 | CH <sub>2</sub> Cl <sub>2</sub> | 427                              | 542                             |
|                 | CH <sub>3</sub> CN              | 423                              | 538                             |

**Table S2** Antiproliferative activity of tested compounds against cancerous and normal cell lines <sup>a</sup>

| Compounds      | IC <sub>50</sub> (μM) |            |            |            |            |
|----------------|-----------------------|------------|------------|------------|------------|
|                | HeLa                  | HepG2      | A549       | A549R      | LO2        |
| <b>Ir1</b>     | 26.7 ± 0.3            | > 100      | 49.8 ± 0.7 | > 100      | > 100      |
| <b>Ir2</b>     | 22.3 ± 0.3            | 55.8 ± 0.6 | 24.0 ± 0.4 | > 100      | > 100      |
| <b>Ir3</b>     | 6.7 ± 0.1             | 29.5 ± 1.5 | 25.8 ± 0.6 | 31.0 ± 0.5 | 36.9 ± 0.9 |
| <b>Ir1+NPX</b> | 25.6 ± 1.8            | > 100      | 51.6 ± 2.0 | > 100      | > 100      |
| <b>Ir2+NPX</b> | 19.9 ± 1.8            | 54.9 ± 2.0 | 23.4 ± 0.9 | > 100      | > 100      |
| <b>Ir3+NPX</b> | 6.3 ± 0.3             | 28.2 ± 1.4 | 26.9 ± 0.7 | 29.7 ± 1.5 | 34.9 ± 1.6 |
| <b>NPX</b>     | > 100                 | > 100      | > 100      | > 100      | > 100      |

<sup>a</sup>Data are presented as the mean ± SD of three repeated measurements.

**Table S3** Cell-cycle analysis data of **Ir-NPX-1–3** on A549R cells



| Compounds                | G0/G1       | S           | G2/M        |
|--------------------------|-------------|-------------|-------------|
| Control                  | 65.89 ± 3.3 | 29.98 ± 2.1 | 4.13 ± 1.2  |
| <b>Ir-NPX-1</b> , 1.0 μM | 70.68 ± 3.2 | 20.57 ± 2.4 | 8.75 ± 2.3  |
| <b>Ir-NPX-1</b> , 2.0 μM | 61.22 ± 3.1 | 28.78 ± 1.1 | 10.00 ± 1.2 |
| <b>Ir-NPX-1</b> , 3.0 μM | 52.25 ± 2.8 | 31.05 ± 1.2 | 16.70 ± 1.3 |
| <b>Ir-NPX-2</b> , 1.6 μM | 76.90 ± 6.3 | 19.30 ± 1.6 | 3.80 ± 0.7  |
| <b>Ir-NPX-2</b> , 3.2 μM | 57.54 ± 3.5 | 30.37 ± 2.3 | 12.09 ± 1.4 |
| <b>Ir-NPX-2</b> , 4.8 μM | 46.33 ± 3.6 | 38.71 ± 2.2 | 14.96 ± 2.3 |
| <b>Ir-NPX-3</b> , 2.1 μM | 66.86 ± 3.2 | 29.11 ± 1.7 | 4.02 ± 1.9  |
| <b>Ir-NPX-3</b> , 4.2 μM | 68.75 ± 2.7 | 21.10 ± 1.8 | 10.15 ± 1.6 |
| <b>Ir-NPX-3</b> , 6.3 μM | 57.45 ± 6.1 | 32.24 ± 1.1 | 10.31 ± 0.3 |
